# Supplementary material for: Third SARS-CoV-2 vaccination and breakthrough infections enhance humoral and cellular immunity against variants of concern
Source: PubMed Central journal article supplement (PMC10073596; doi:10.3389/fimmu.2023.1120010), 2023-03-22

**A****post 2<sup>nd</sup> vaccination**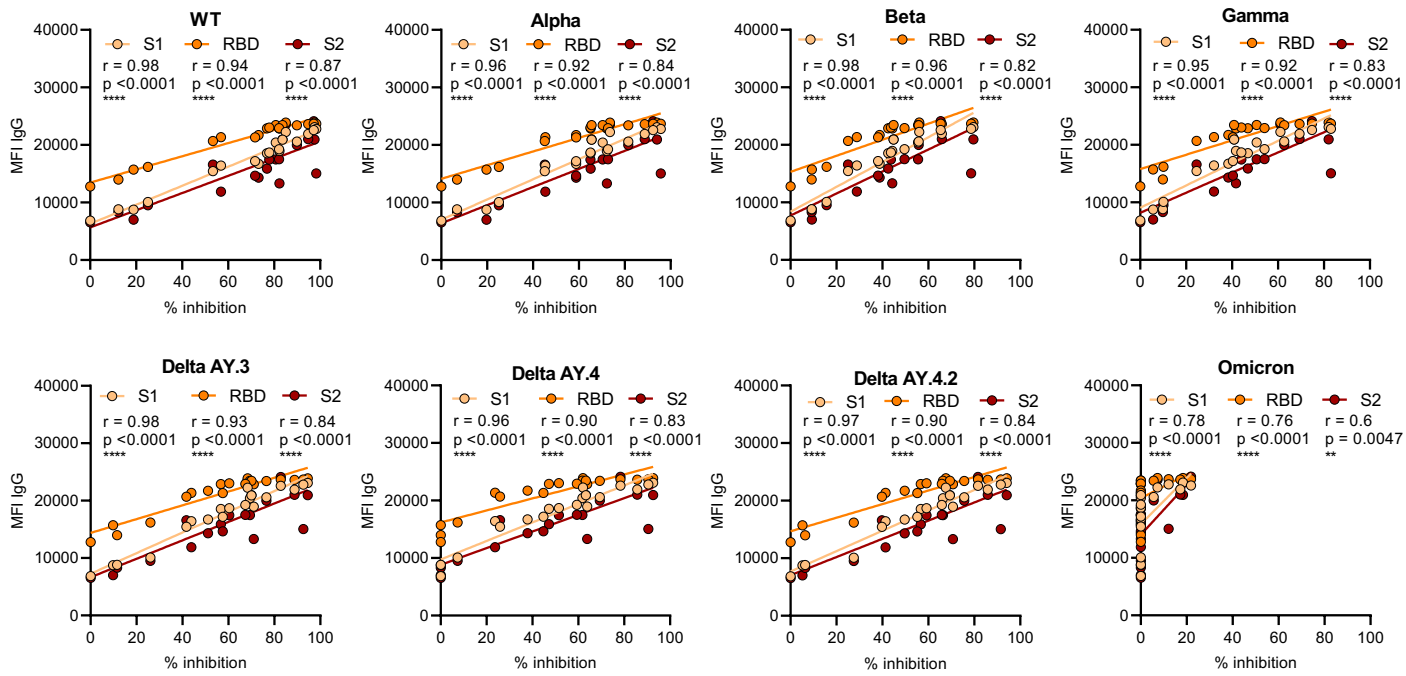**B****post 3<sup>rd</sup> vaccination**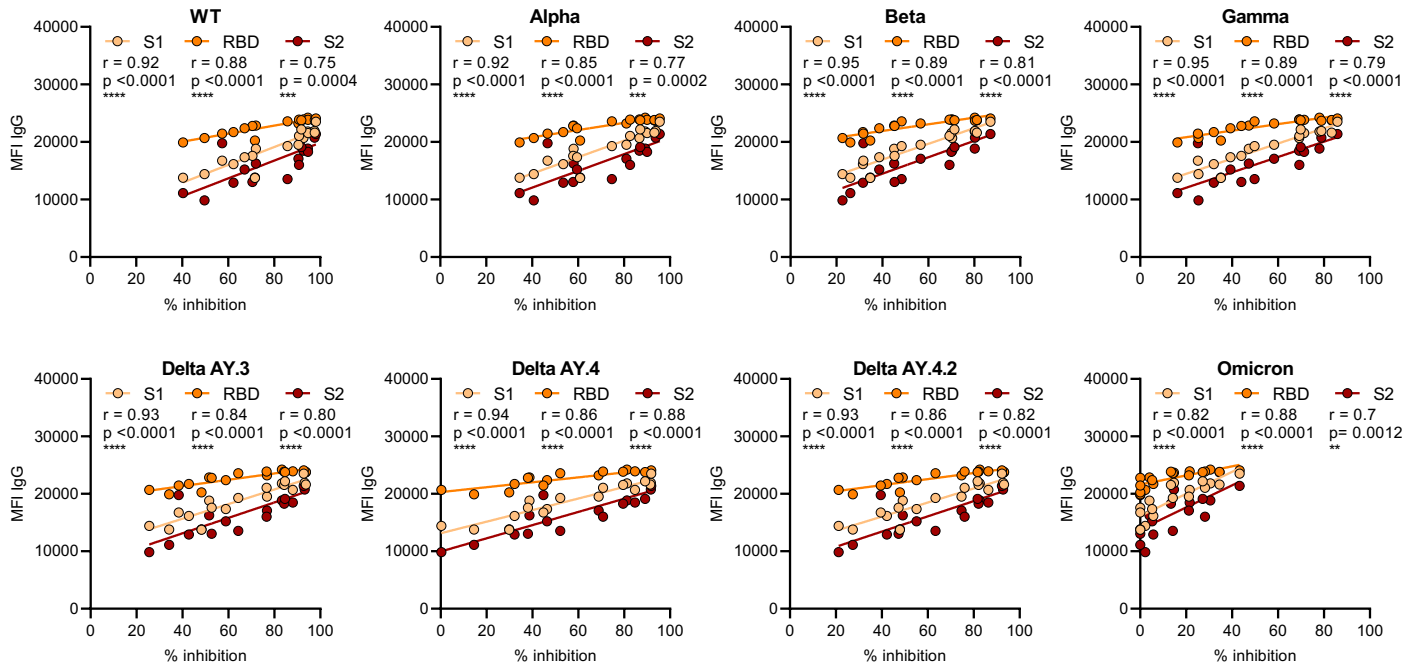**C**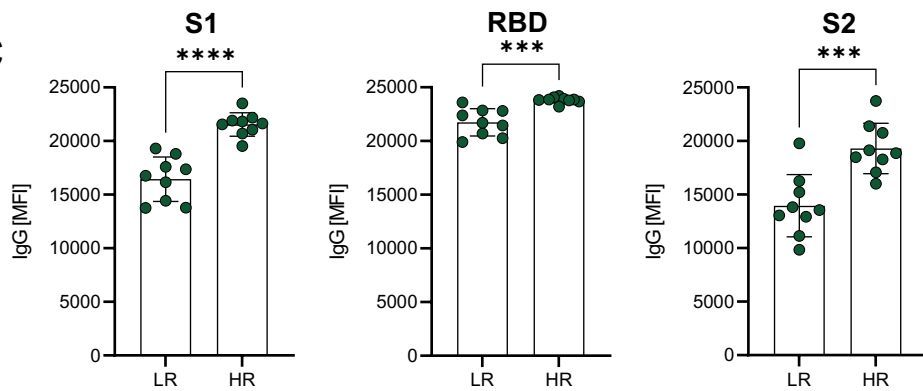**D**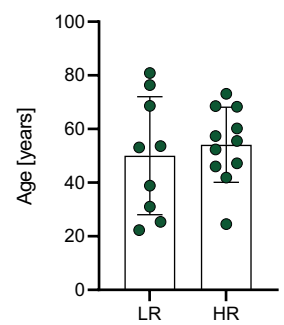

Supplement: Image_2.pdf [file Image_2.pdf]
