# Supplementary material for: Third SARS-CoV-2 vaccination and breakthrough infections enhance humoral and cellular immunity against variants of concern
Source: PubMed Central journal article supplement (PMC10073596; doi:10.3389/fimmu.2023.1120010), 2023-03-22

**CD4<sup>+</sup> T cells**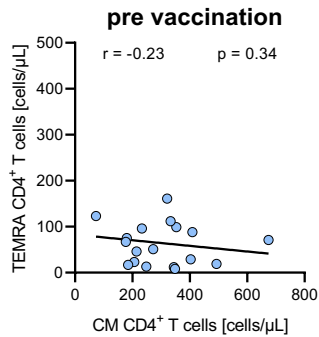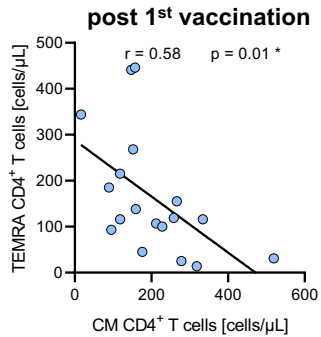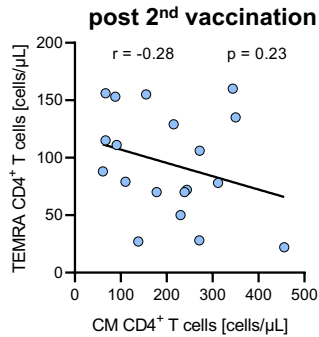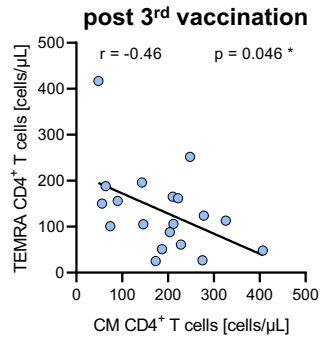**CD8<sup>+</sup> T cells**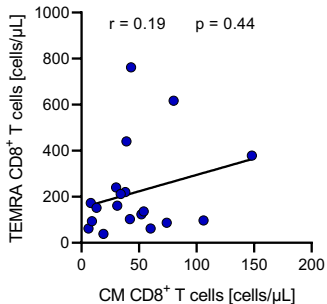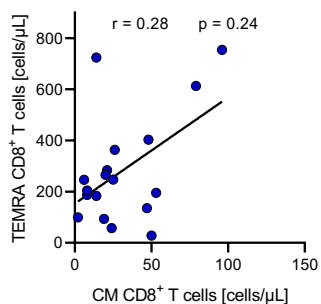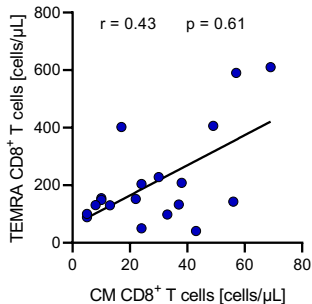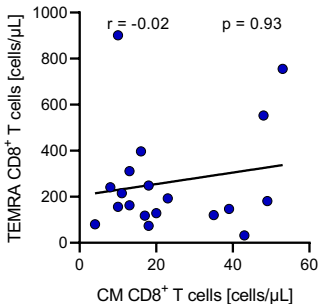

Supplement: Image_4.pdf [file Image_4.pdf]
