# Supplementary material for: Third SARS-CoV-2 vaccination and breakthrough infections enhance humoral and cellular immunity against variants of concern
Source: PubMed Central journal article supplement (PMC10073596; doi:10.3389/fimmu.2023.1120010), 2023-03-22
Supplement: Table_1.pdf [file Table_1.pdf]

| Characteristics                 | 3xmRNA cohort       | vector/2xmRNA cohort  | vac <sup>3</sup> +infection |
|---------------------------------|---------------------|-----------------------|-----------------------------|
| Sample number n                 | 8                   | 12                    | 22                          |
| Age in years<br>(Min - Max)     | 68.8<br>(46 - 80.9) | 42.2<br>(22.3 - 60.2) | 40.6<br>(23.6 - 78.2)       |
| Gender                          |                     |                       |                             |
| Female                          | 3 (43%)             | 9 (75%)               | 15 (68%)                    |
| Male                            | 4 (57%)             | 3 (25%)               | 7 (32%)                     |
| Time past after vac.            |                     |                       |                             |
| Days post 1 <sup>st</sup> vac.  | 20                  | 14                    | n.A                         |
| Days post 2 <sup>nd</sup> vac.  | 29                  | 23                    | n.A                         |
| Weeks post 3 <sup>rd</sup> vac. | 7                   | 5                     | n.A                         |
| Time past after infection       |                     |                       |                             |
| Weeks post infection            | n.A                 | n.A                   | 4,9 (3 - 11)                |
