# Supplementary material for: Third SARS-CoV-2 vaccination and breakthrough infections enhance humoral and cellular immunity against variants of concern
Source: PubMed Central journal article supplement (PMC10073596; doi:10.3389/fimmu.2023.1120010), 2023-03-22
Supplement: Table_2.pdf [file Table_2.pdf]

| Nr. | Age  | Sex | 1st vaccine | 2nd vaccine | 3rd vaccine | time post 1st vac | time post 2nd vac | time post 3rd vac | vaccine cohort |
|-----|------|-----|-------------|-------------|-------------|-------------------|-------------------|-------------------|----------------|
| 1   | 53,6 | F   | ChAd        | BNT         | BNT         | 14d               | 20d               | 4W                | vector/2xmRNA  |
| 2   | 52,4 | M   | ChAd        | BNT         | BNT         | 13d               | 21d               | 6W                | vector/2xmRNA  |
| 3   | 80,9 | F   | BNT         | BNT         | BNT         | 3W                | 7W                | 7W                | 3xmRNA         |
| 4   | 60,2 | M   | ChAd        | MDN         | MDN         | 18d               | 23d               | 6W                | vector/2xmRNA  |
| 5   | 24,5 | F   | ChAd        | BNT         | BNT         | 14d               | 27d               | 5W                | vector/2xmRNA  |
| 6   | 68,5 | M   | BNT         | BNT         | BNT         | 17d               | 25d               | 7W                | 3xmRNA         |
| 7   | 31,0 | M   | ChAd        | BNT         | BNT         | 12d               | 26d               | 8W                | vector/2xmRNA  |
| 8   | 38,9 | F   | ChAd        | BNT         | MDN         | 15d               | 27d               | 5W                | vector/2xmRNA  |
| 9   | 55,5 | F   | ChAd        | BNT         | MDN         | 14d               | 21d               | 5W                | vector/2xmRNA  |
| 10  | 53,1 | F   | ChAd        | BNT         | MDN         | 13d               | 20d               | 5W                | vector/2xmRNA  |
| 11  | 68,3 | M   | BNT         | BNT         | BNT         | 16d               | 24d               | 7W                | 3xmRNA         |
| 12  | 25,4 | F   | ChAd        | BNT         | BNT         | 13d               | 22d               | 4W                | vector/2xmRNA  |
| 13  | 73,1 | F   | BNT         | BNT         | MDN         | 18d               | 28d               | 5W                | 3xmRNA         |
| 14  | 68,6 | F   | BNT         | BNT         | BNT         | 14d               | 21d               | 7W                | 3xmRNA         |
| 15  | 57,4 | M   | BNT         | BNT         | BNT         | 14d               | 3W                | 4W                | 3xmRNA         |
| 16  | 46,0 | M   | BNT         | BNT         | MDN         | 29d               | 24d               | 7W                | 3xmRNA         |
| 17  | 76,4 | M   | BNT         | BNT         | BNT         | 22d               | 32d               | 8W                | 3xmRNA         |
| 18  | 22,3 | F   | ChAd        | BNT         | BNT         | 13d               | 23d               | 8W                | vector/2xmRNA  |
| 19  | 47,2 | F   | ChAd        | BNT         | BNT         | 16d               | 29d               | 5W                | vector/2xmRNA  |
| 20  | 41,9 | F   | ChAd        | BNT         | MDN         | 13d               | 21d               | 4W                | vector/2xmRNA  |
