# Supplementary material for: Third SARS-CoV-2 vaccination and breakthrough infections enhance humoral and cellular immunity against variants of concern
Source: PubMed Central journal article supplement (PMC10073596; doi:10.3389/fimmu.2023.1120010), 2023-03-22
Supplement: Table_3.pdf [file Table_3.pdf]

| <b>Target</b> | <b>Fluorochrome</b> | <b>Clone</b> | <b>Manufacturer</b> |
|---------------|---------------------|--------------|---------------------|
| CD2           | FITC                | S5.2         | BD Biosciences      |
| CD3           | Horizon V500        | UCHT1        | BD Biosciences      |
| CD3           | PerCP               | SK7          | BD Biosciences      |
| CD3           | APC-H7              | SK7          | BD Biosciences      |
| CD4           | PerCP               | SK3          | BD Biosciences      |
| CD6           | FITC                | M-T605       | BD Biosciences      |
| CD8           | APC-H7              | SK1          | BD Biosciences      |
| CD14          | PE-Cy7              | MφP9         | BD Biosciences      |
| CD16          | APC                 | B73.1        | BD Biosciences      |
| CD19          | PerCP               | SJ25C1       | BD Biosciences      |
| CD20          | APC-H7              | L27          | BD Biosciences      |
| CD24          | FITC                | ML5          | BD Biosciences      |
| CD25          | BV421               | 2A3          | BD Biosciences      |
| CD27          | BV421               | M-T271       | BD Biosciences      |
| CD27          | FITC                | L128         | BD Biosciences      |
| CD28          | APC                 | CD28.2       | BD Biosciences      |
| CD38          | APC                 | HIT2         | BD Biosciences      |
| CD38          | PE                  | HB7          | BD Biosciences      |
| CD45          | Alexa Fluor 700     | HI30         | BioLegend           |
| CD45          | APC-H7              | 2D1          | BD Biosciences      |
| CD45RO        | PE-Cy7              | UCHL-1       | BD Biosciences      |
| CD56          | PE                  | B159         | BD Biosciences      |
| CD57          | BV421               | NK-1         | BD Biosciences      |
| CD69          | FITC                | FN50         | BD Biosciences      |
| CD127         | Alexa Fluor 647     | HIL-7R-M21   | BD Biosciences      |
| CD197 (CCR7)  | PE                  | 150503       | BD Biosciences      |
| IgD           | PE-Cy7              | IAG-2        | BD Biosciences      |
| HLA-DR        | Horizon V500        | G46-6        | BD Biosciences      |
